# Supplementary material for: Unveiling the Impact of Drying Methods on Phytochemical Composition and Antioxidant Activity of Anthemis palestina
Source: MDPI journal article supplement (doi:10.3390/plants12223914), 2023-11-20
Supplement: s1 [file s1]

## **Unveiling the Impact of Drying Methods on Phytochemical Composition and Antioxidant Activity of *Anthemis palestina***

### **Materials and Methods**

#### **Determination of the Total Flavonoids content (TFC):**

In a separate volumetric flask (10 mL), an aliquot (1 mL) of extracts with a concentration of 1 mg/mL was obtained, then an amount of 4 mL of distilled water was added, followed by 0.3 mL of sodium nitrite (5% NaNO<sub>2</sub>, w/v) and allowed to stand for 5 minutes. After that, an amount of 0.3 mL of aluminium chloride (10% AlCl<sub>3</sub>) was added and incubated for 6 minutes, followed by 2 mL of sodium hydroxide (NaOH, 1 M) and distilled water to make up a solution of 10 mL. Absorbance was measured at 510 nm after 15 minutes. As a control, methanol was employed.

#### **Determination of Total Phenolic Content (TPC):**

2.5 mL of Folin-Ciocalteu reagent (2N) (tenfold diluted) and 2 mL of Na<sub>2</sub>CO<sub>3</sub> (75 g/L) were added to 0.5 mL of extract. After 15 minutes at room temperature, the absorbance of the mixture was measured with a (UV-Vis) spectrophotometer at 765 nm in comparison to a blank methanol solution. The absorbance was measured at various concentrations (4-20 mg/mL) using gallic acid as a calibration curve standard. All measurements were performed in triplicate. The total phenolic content is expressed as milligrams per gram of gallic acid equivalent.

#### **Antioxidant activity of HDEOs and methanolic extracts**

##### **DPPH• Free Radical Scavenging Activity:**

A 0.1mM DPPH• solution was prepared in methanol, and 2 mL of this solution was added to 2 mL of methanol extract solution at various concentrations (0.005, 0.01, 0.05, 0.1, 0.5, and 1.0) mg/mL, and 1 mL of DPPH• solution was added to 3 mL of essential oil solution in methanol at different concentrations ( $4.0 \times 10^{-4}$ ,  $2 \times 10^{-3}$ ,  $2.80 \times 10^{-3}$ ,  $4 \times 10^{-3}$ ,  $8 \times 10^{-3}$ ) and the absorbance was sample measured at 517

nm by using UV-Vis spectrophotometer. For 30 minutes, these solutions were incubated in the dark. The absorbance was then measured at 517 nm against blank samples lacking scavenger, and the experiment was repeated three times. A standard curve was created using various DPPH• concentrations.

When exposed to radical scavengers, [DPPH•] decreases significantly. The IC<sub>50</sub> value was introduced as a parameter for interpreting the results of the DPPH method. This is defined as the substrate concentration that results in a 50% loss of DPPH activity. The linear regression method was used to calculate IC<sub>50</sub> values from plots of the percent of antiradical activity against the concentration of the tested compounds.

### **2.7.2 ABTS•<sup>+</sup> Radical Scavenging Assay**

The stock solutions contain ABTS solution (7 mM) and potassium persulphate solution (2.4 mM) (K<sub>2</sub>S<sub>2</sub>O<sub>8</sub>). The working solution was then created by combining the two stock solutions in equal parts and allowing them to react in the dark for 16 hours. This solution was diluted with distilled water before use to obtain an absorbance of 0.75 ± 0.02 at 734 nm using a spectrophotometer. 3 mL of ABTS•<sup>+</sup> solution was added to 2 mL of extracts at different concentrations (0.005, 0.01, 0.05, 0.1 and 0.5) mg/mL, and 1 mL of ABTS•<sup>+</sup> solution was added to 3 mL of essential oil solution in methanol at different concentrations (4.0×10<sup>-4</sup>, 2×10<sup>-3</sup>, 2.80×10<sup>-3</sup>, 4×10<sup>-3</sup> and 8×10<sup>-3</sup>) and the absorbance was sample measured at 734 nm by using UV-Vis spectrophotometer. Ascorbic acid and α- tocopherol were used as a positive control for the same concentrations of the crude extracts and essential oils. After 5 minutes of mixing, the absorbance was measured at 734 nm with a spectrophotometer, and the percentage of radical scavenging was calculated for each concentration relative to a blank containing no scavenger.

The IC<sub>50</sub> values were calculated using the linear regression method of plotting the percent of antiradical activity against the concentration of the tested compounds.

### 3.8. LC-MS analysis of phytochemicals

This instrument was operated using the Ion Source Apollo II ion Funnel electrospray source. The capillary voltage was 2500 V, the nebulizer gas was 2.0 bar, the dry gas (nitrogen) flow was 8 L/min and the dry temperature was 200 °C. The mass accuracy was < 1 ppm; the mass resolution was 50000 FSR (Full Sensitivity Resolution) and the TOF repetition rate was up to 20 kHz. using Elute UHPLC coupled to a Bruker impact II QTOFMS. Chromatographic separation was performed using Bruker solo 2.0\_C-18 UHPLC column (100 mm x 2.1 mm x 2.0 µm) at a flow rate of 0.51 mL / min and a column temperature of 40°C. Solvents: (A) water with 0.05% formic acid and (B) acetonitrile Gradient: 0 – 27 min linear gradient from 5% - 80% B; 27 – 29 min 95% B; 29.1 min 5% B, total analysis time was 35 min on positive and 35 min on negative mode injection volume 3 µl.

**Sample preparation:** Unknown sample have been dissolved with 100µl DMSO and 900µl MeOH, centrifuge the sample then filter the sample before injection, we Take 1.0 ml and transfer to autosampler and Inject 3.0 µl. (All standard used for identification of ms/z and the retention time).

#### Standards Used

| No | Analyte Name                            |
|----|-----------------------------------------|
| 1  | 3-Oxocostusic acid                      |
| 2  | 4-Hydroxybenzoic acid                   |
| 3  | 4-Hydroxy-Coumarin                      |
| 4  | 4-OH-Coumarinic acid                    |
| 5  | 5,6,4'-Trihydroxy-7,3'-dimethoxyflavone |
| 6  | 7-Hydroxy-Coumarin                      |
| 7  | Adenosine                               |
| 8  | Aesculetin                              |
| 9  | Ajugoside                               |
| 10 | ALPHA AMYRIN                            |

|    |                                     |
|----|-------------------------------------|
| 11 | Apigenin                            |
| 12 | Benzoic acid                        |
| 13 | Beta-amyrin                         |
| 14 | Caffeic acid phenethyl ester (cape) |
| 15 | Caffeic Acid                        |
| 16 | Caffeine                            |
| 17 | Carnosic acid                       |
| 18 | Catechin                            |
| 19 | Catechol                            |
| 20 | Chlorogenic acid                    |
| 21 | chrysin                             |
| 22 | Cinnamic acid                       |
| 23 | Colchicine                          |
| 24 | Crotonoyl Cosmisiin                 |
| 25 | Ellagic acid                        |
| 26 | Epicatechin                         |
| 27 | Ferulic acid                        |
| 28 | Galangin                            |
| 29 | Galangustin                         |
| 30 | Gallic acid                         |
| 31 | Gallic acid-ethyl                   |
| 32 | Hesperidin                          |
| 33 | Hispidulin                          |
| 34 | Hyperoside                          |
| 35 | Isoorientin                         |
| 36 | Kaempferol                          |
| 37 | Kumatakenin                         |
| 38 | Ladanetin                           |
| 39 | Lupeol                              |
| 40 | Luteolin                            |

|    |                               |
|----|-------------------------------|
| 41 | Luteolin 7-O-glucoside        |
| 42 | Myricetin                     |
| 43 | Naringenin                    |
| 44 | Naringin                      |
| 45 | p-Coumaric acid               |
| 46 | Pivalic Acid                  |
| 47 | Procayadnin                   |
| 48 | Quercetin                     |
| 49 | Quercetin 3,3'-dimethyl ether |
| 50 | Resveratrol                   |
| 51 | Rosmarinic Acid               |
| 52 | Rutin                         |
| 53 | Salvianolic acid B            |
| 54 | Succinic acid                 |
| 55 | Syringic acid                 |
| 56 | Taraxasterol                  |
| 57 | Vanillic acid                 |
| 58 | Vanillin                      |
| 59 | Vitexin                       |

Figures S1-S5

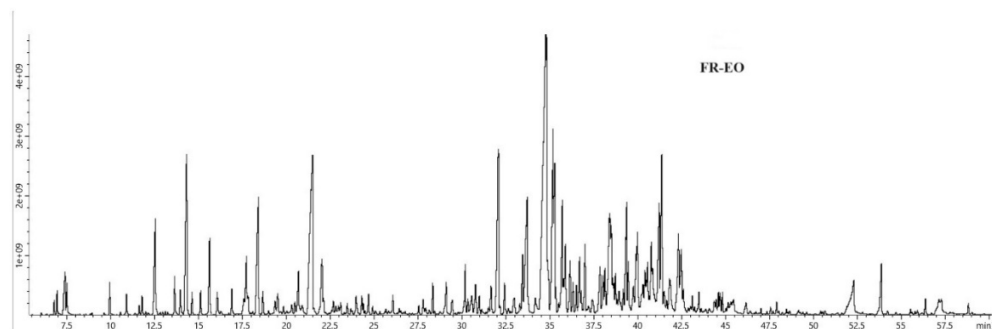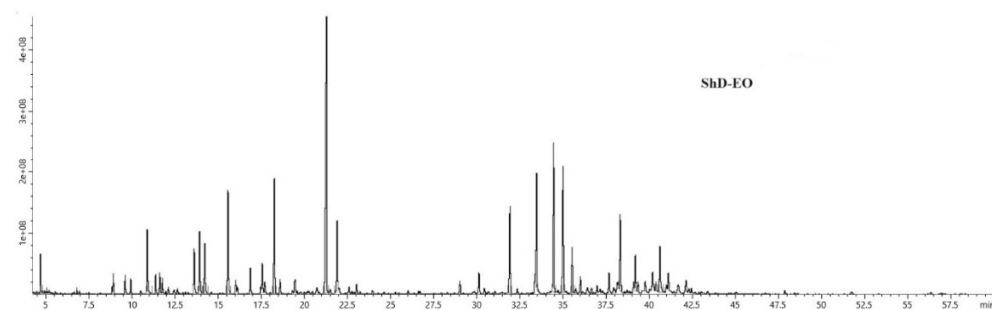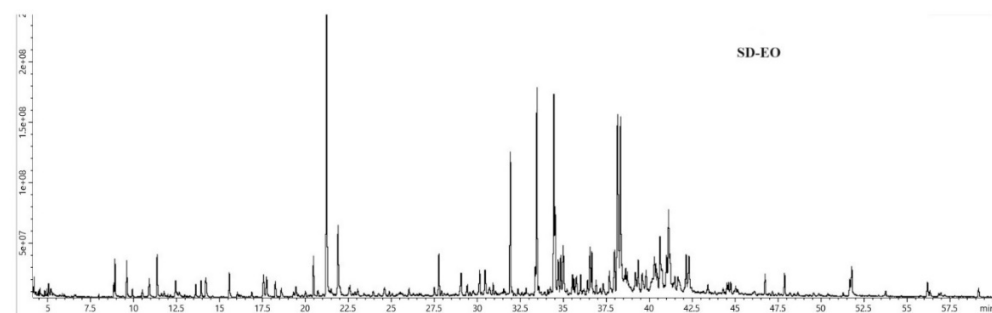

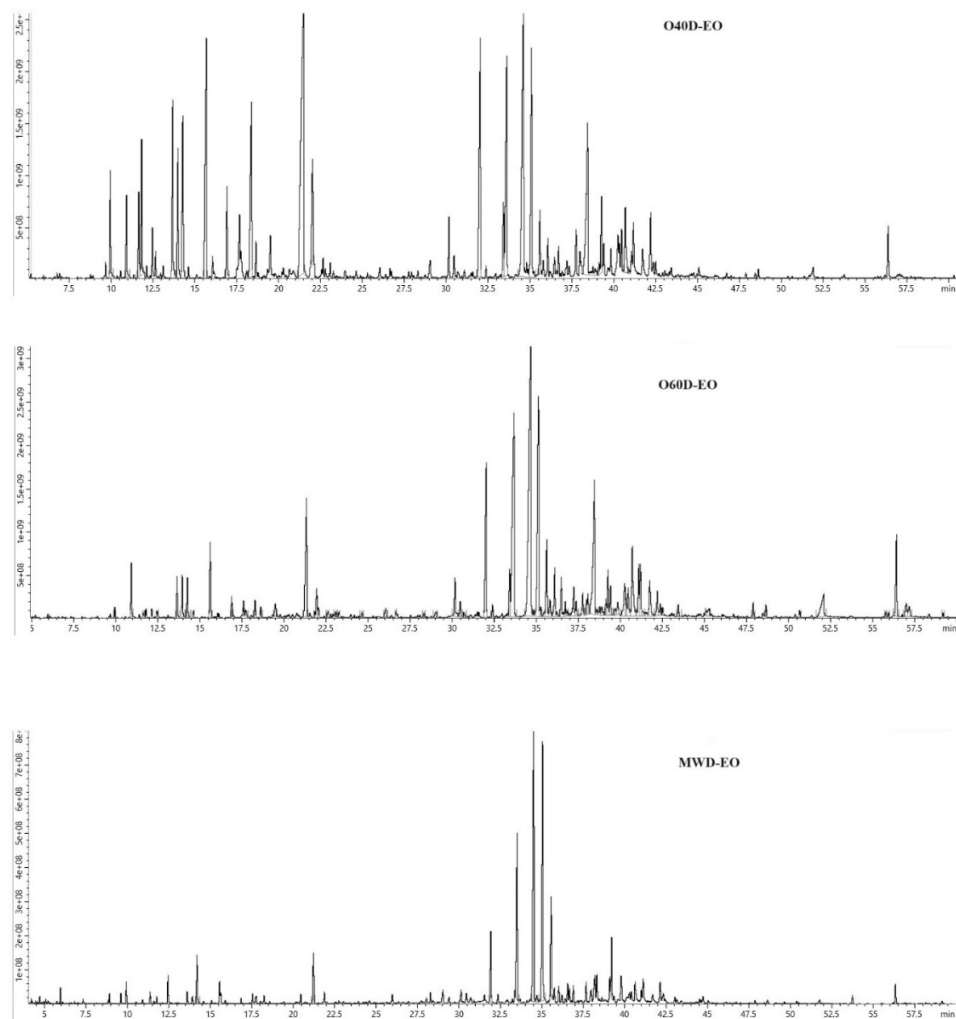

Figure S1: Representative gas chromatograms for oils extracted from *A. palaestina* obtained by hydro-distillation at different drying methods in comparison to the fresh sample.

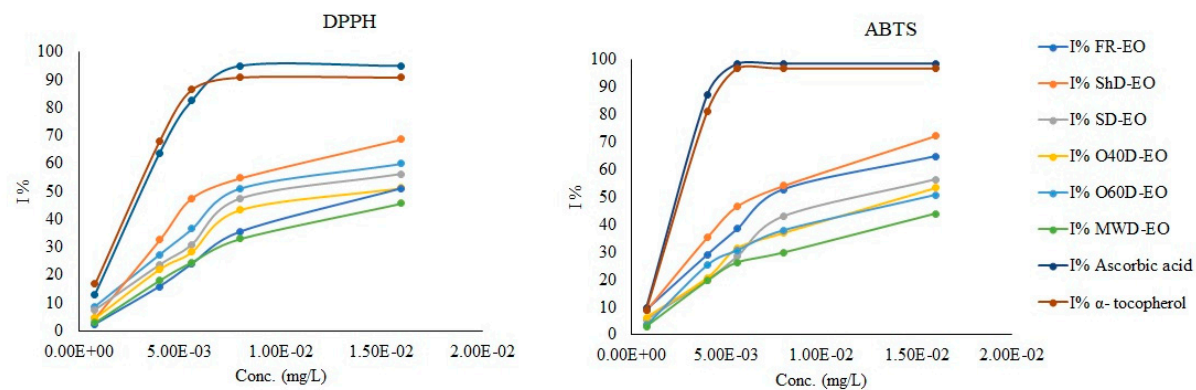

Figure S2: Antioxidant activity (DPPH and ABTS) of the essential oils (EO) from *A. Palestina* obtained by hydro-distillation at different drying methods in comparison to the fresh sample.

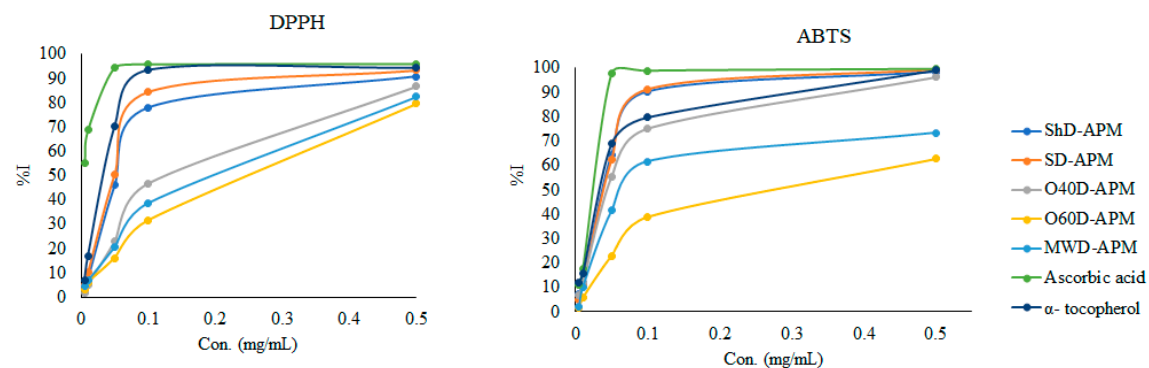

Figure S3: Antioxidant activity (DPPH and ABTS) of the methanol extract from *A. Palestina* (APM) obtained by different drying methods.

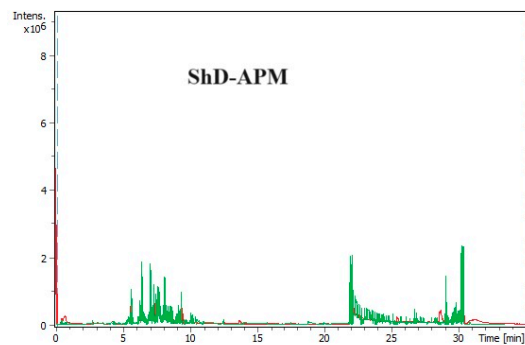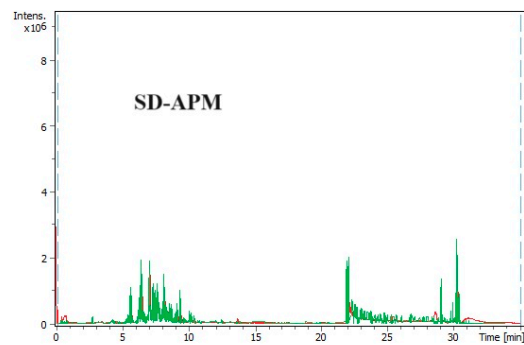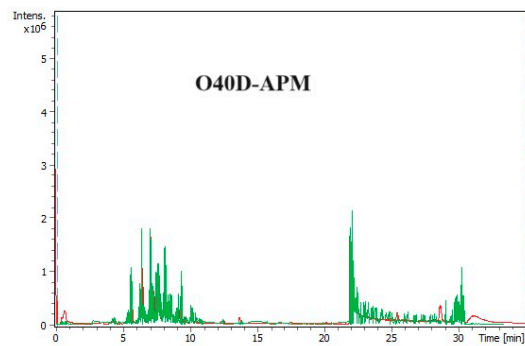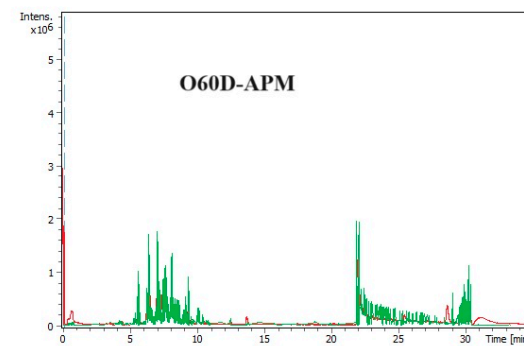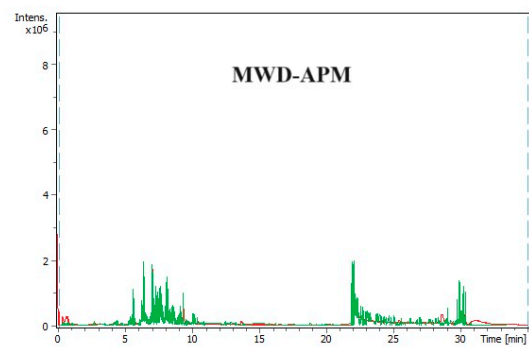

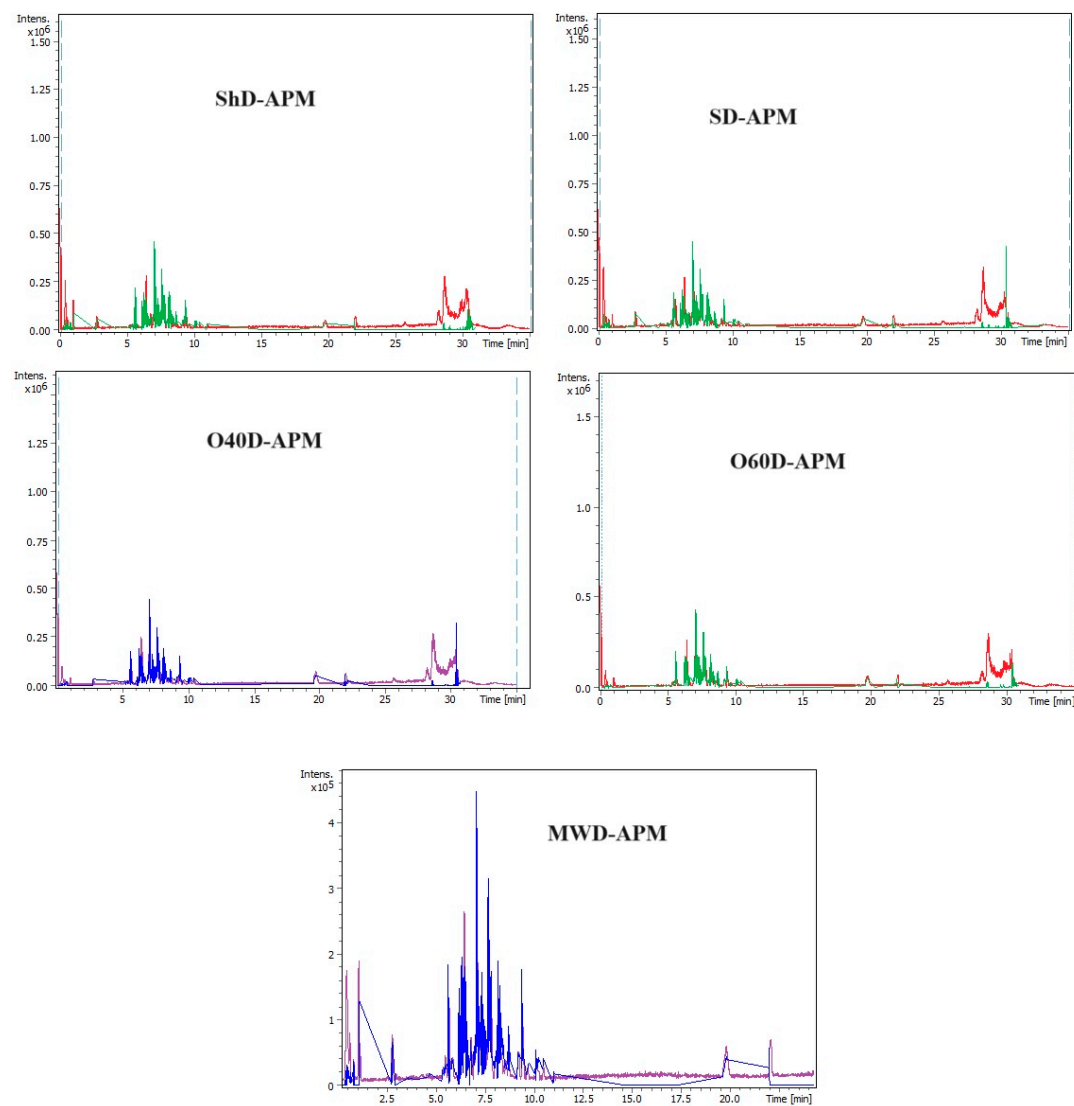

Figure S4: LC-MS chromatograms (positive and negative modes) of methanol extract from *A. palestina* (APM) obtained at different drying methods.

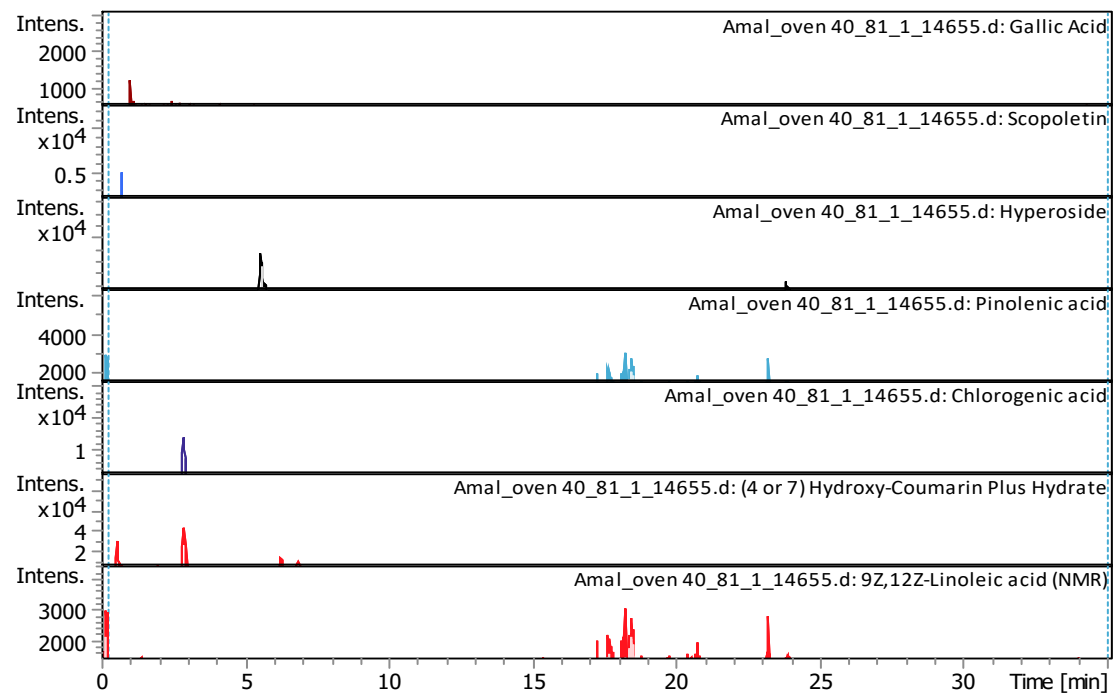

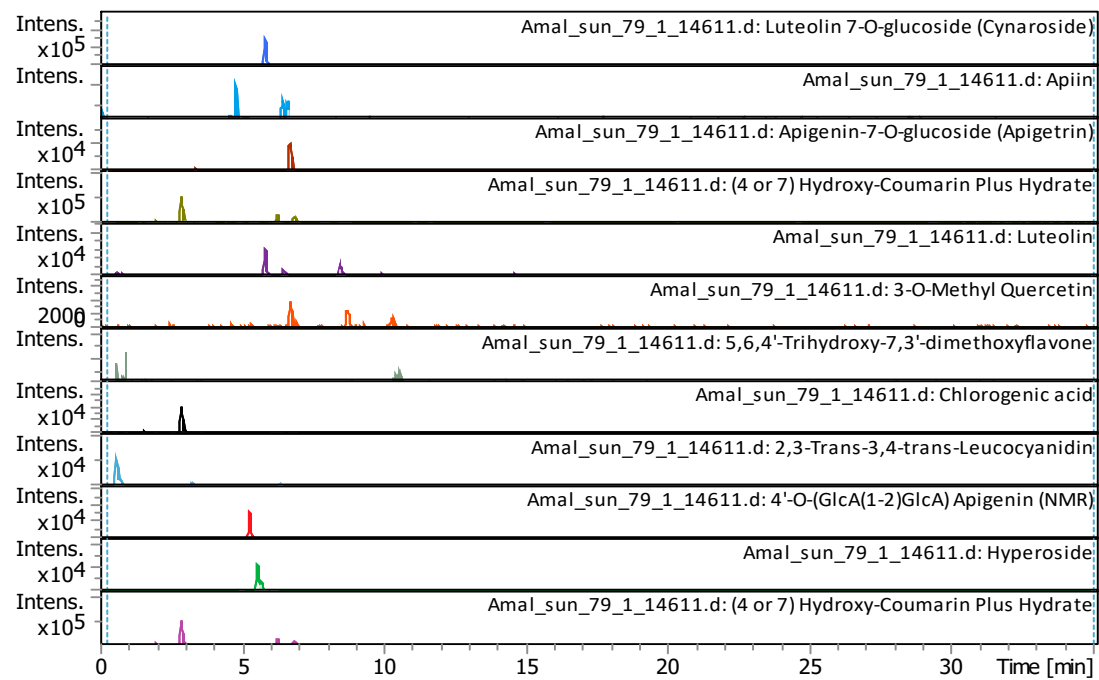

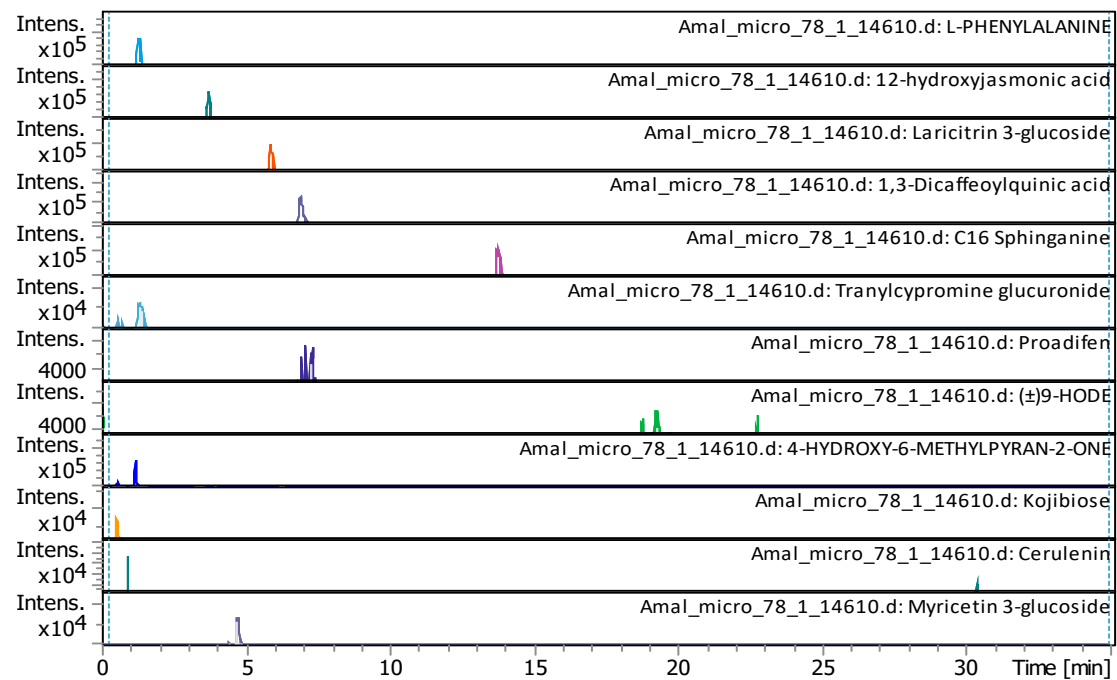

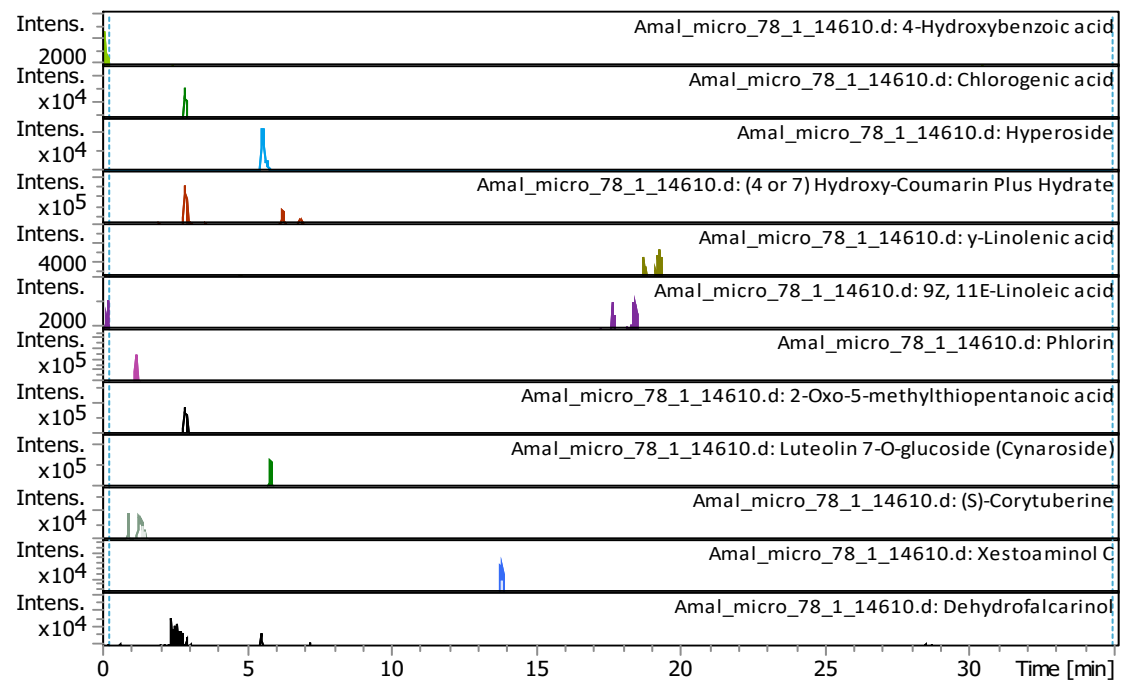

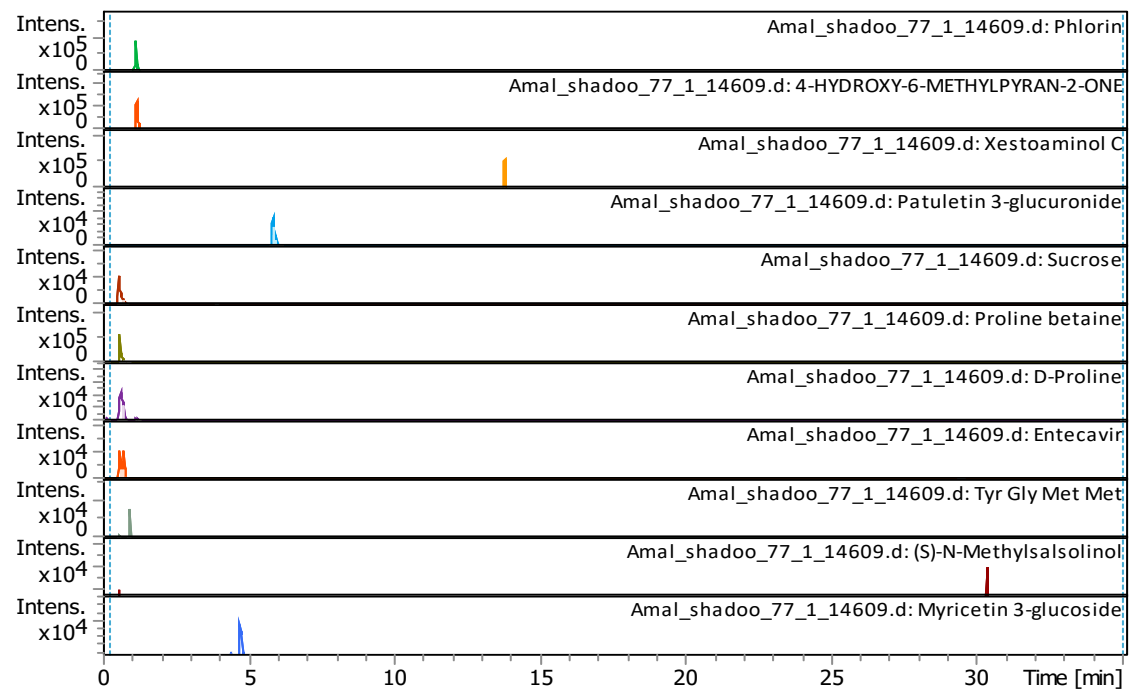

Figure S5: standards

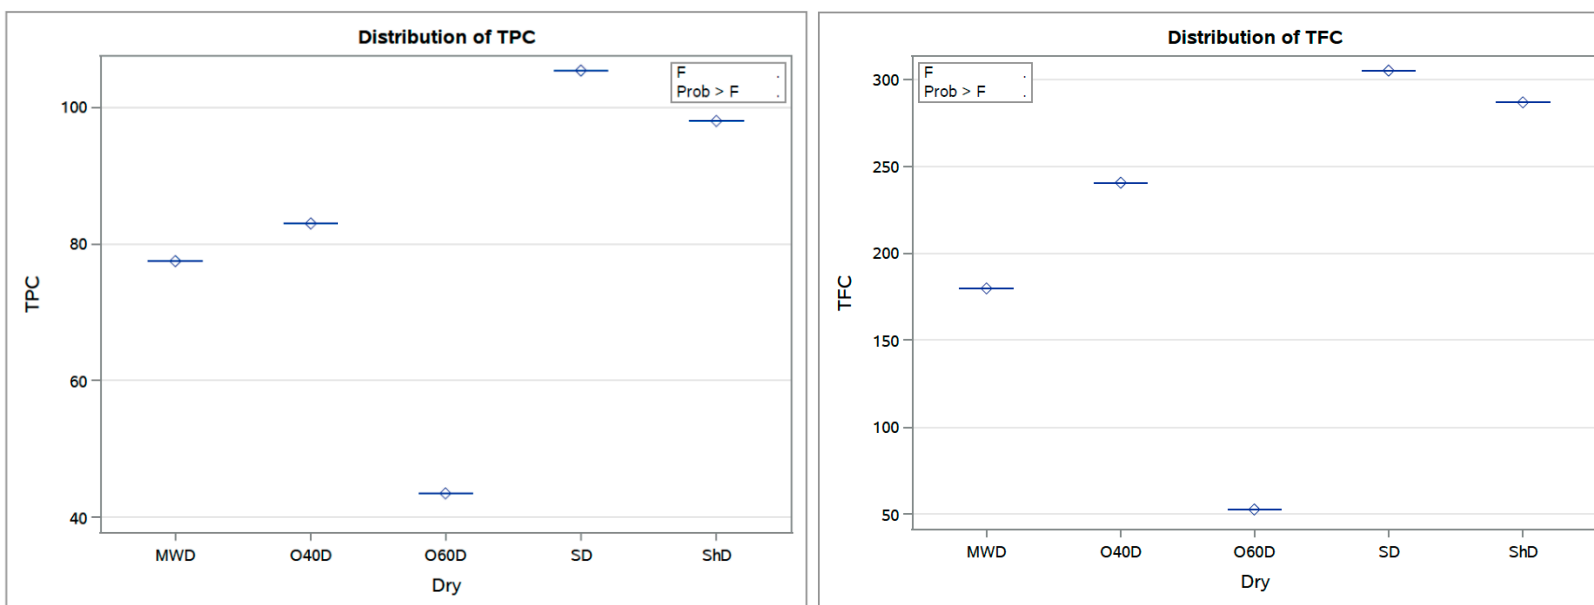

Figure S6. Distribution of TPC and TFC among the different APM extracts obtained using different drying methods.

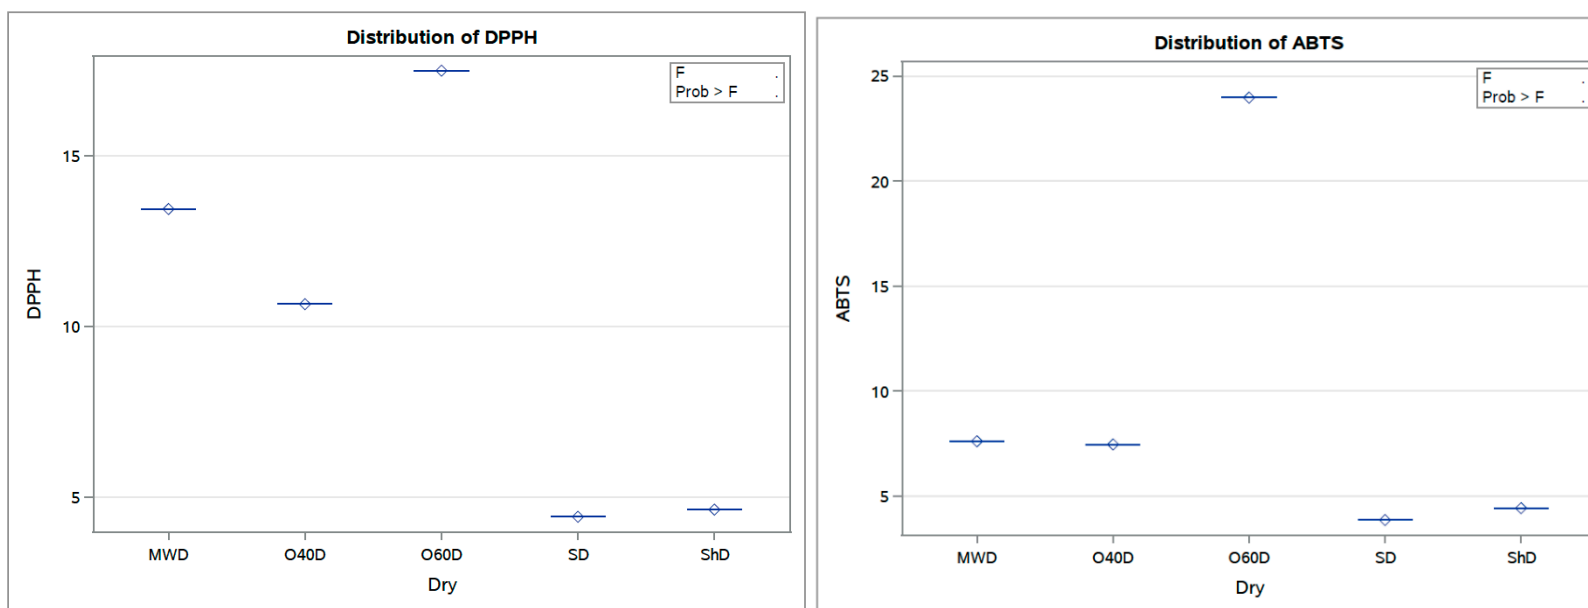

Figure S7. Distribution of DPPH and ABTS antioxidant activities among the different APM extracts obtained using different drying methods.
